# Supplementary material
Source: PubMed Central journal article supplement (PMC6486425)
Supplement: NIHMS1525815-supplement-1.pdf [file NIHMS1525815-supplement-1.pdf]

|           |  |                                                                                                   |     |     |     |   |   |   |   |   |   |   |   |   |   |   |   |   |   |   |   |   |   |   |   |   |   |   |   |   |   |   |   |   |   |   |   |   |   |   |   |
|-----------|--|---------------------------------------------------------------------------------------------------|-----|-----|-----|---|---|---|---|---|---|---|---|---|---|---|---|---|---|---|---|---|---|---|---|---|---|---|---|---|---|---|---|---|---|---|---|---|---|---|---|
|           |  | 10                                                                                                | 20  | 30  | 40  |   |   |   |   |   |   |   |   |   |   |   |   |   |   |   |   |   |   |   |   |   |   |   |   |   |   |   |   |   |   |   |   |   |   |   |   |
|           |  | . . . .   . . . .   . . . .   . . . .   . . . .   . . . .   . . . .   . . . .   . . . .   . . . . |     |     |     |   |   |   |   |   |   |   |   |   |   |   |   |   |   |   |   |   |   |   |   |   |   |   |   |   |   |   |   |   |   |   |   |   |   |   |   |
| CAN 97-83 |  | M                                                                                                 | S   | W   | K   | V | V | I | I | F | S | L | L | I | T | P | Q | H | G | L | K | E | S | Y | L | E | E | S | C | S | T | I | T | E | G | Y | L | S | V | L | R |
| S175H434  |  | M                                                                                                 | S   | W   | K   | V | V | I | I | F | S | L | L | I | T | P | Q | H | G | L | K | E | S | Y | L | E | E | S | C | S | T | I | T | E | G | Y | L | S | V | L | R |
| TN 94-49  |  | M                                                                                                 | S   | W   | K   | V | V | I | I | F | S | L | L | I | T | P | Q | H | G | L | K | E | S | Y | L | E | E | S | C | S | T | I | T | E | G | Y | L | S | V | L | R |
| TN 96-12  |  | M                                                                                                 | S   | W   | K   | V | V | I | I | F | S | L | L | I | T | P | Q | H | G | L | K | E | S | Y | L | E | E | S | C | S | T | I | T | E | G | Y | L | S | V | L | R |
|           |  | 50                                                                                                | 60  | 70  | 80  |   |   |   |   |   |   |   |   |   |   |   |   |   |   |   |   |   |   |   |   |   |   |   |   |   |   |   |   |   |   |   |   |   |   |   |   |
|           |  | . . . .   . . . .   . . . .   . . . .   . . . .   . . . .   . . . .   . . . .   . . . .   . . . . |     |     |     |   |   |   |   |   |   |   |   |   |   |   |   |   |   |   |   |   |   |   |   |   |   |   |   |   |   |   |   |   |   |   |   |   |   |   |   |
| CAN 97-83 |  | T                                                                                                 | G   | W   | Y   | T | N | V | F | T | L | E | V | G | D | V | E | N | L | T | C | S | D | G | P | S | L | I | K | T | E | L | D | L | T | K | S | A | L | R | E |
| S175H434  |  | T                                                                                                 | G   | W   | Y   | T | N | V | F | T | L | E | V | G | D | V | E | N | L | T | C | S | D | G | P | S | L | I | K | T | E | L | D | L | T | K | S | A | L | R | E |
| TN 94-49  |  | T                                                                                                 | G   | W   | Y   | T | N | V | F | T | L | E | V | G | D | V | E | N | L | T | C | A | D | G | P | S | L | I | K | T | E | L | E | L | T | K | S | A | L | R | E |
| TN 96-12  |  | T                                                                                                 | G   | W   | Y   | T | N | V | F | T | L | E | V | G | D | V | E | N | L | T | C | A | D | G | P | S | L | I | K | T | E | L | D | L | T | K | S | A | L | R | E |
|           |  | 90                                                                                                | 100 | 110 | 120 |   |   |   |   |   |   |   |   |   |   |   |   |   |   |   |   |   |   |   |   |   |   |   |   |   |   |   |   |   |   |   |   |   |   |   |   |
|           |  | . . . .   . . . .   . . . .   . . . .   . . . .   . . . .   . . . .   . . . .   . . . .   . . . . |     |     |     |   |   |   |   |   |   |   |   |   |   |   |   |   |   |   |   |   |   |   |   |   |   |   |   |   |   |   |   |   |   |   |   |   |   |   |   |
| CAN 97-83 |  | L                                                                                                 | K   | T   | V   | S | A | D | Q | L | A | R | E | E | Q | I | E | N | P | R | Q | S | R | F | V | L | G | A | I | A | L | G | V | A | T | A | A | A | V | T | A |
| S175H434  |  | L                                                                                                 | K   | T   | V   | S | A | D | Q | L | A | R | E | E | Q | I | E | N | P | R | Q | S | R | F | V | L | G | A | I | A | L | G | V | A | T | A | A | A | V | T | A |
| TN 94-49  |  | L                                                                                                 | K   | T   | V   | S | A | D | Q | L | A | R | E | E | Q | I | E | N | P | R | Q | S | R | F | V | L | G | A | I | A | L | G | V | A | T | A | A | A | V | T | A |
| TN 96-12  |  | L                                                                                                 | R   | T   | V   | S | A | D | Q | L | A | R | E | E | Q | I | E | N | P | R | Q | S | R | F | V | L | G | A | I | A | L | G | V | A | T | A | A | A | V | T | A |
|           |  | 130                                                                                               | 140 | 150 | 160 |   |   |   |   |   |   |   |   |   |   |   |   |   |   |   |   |   |   |   |   |   |   |   |   |   |   |   |   |   |   |   |   |   |   |   |   |
|           |  | . . . .   . . . .   . . . .   . . . .   . . . .   . . . .   . . . .   . . . .   . . . .   . . . . |     |     |     |   |   |   |   |   |   |   |   |   |   |   |   |   |   |   |   |   |   |   |   |   |   |   |   |   |   |   |   |   |   |   |   |   |   |   |   |
| CAN 97-83 |  | G                                                                                                 | V   | A   | I   | A | K | T | I | R | L | E | S | E | V | T | A | I | K | N | A | L | K | T | T | N | E | A | V | S | T | L | G | N | G | V | R | V | L | A | T |
| S175H434  |  | G                                                                                                 | V   | A   | I   | A | K | T | I | R | L | E | S | E | V | T | A | I | K | N | A | L | K | T | T | N | E | A | V | S | T | L | G | N | G | V | R | V | L | A | T |
| TN 94-49  |  | G                                                                                                 | V   | A   | I   | A | K | T | I | R | L | E | S | E | V | T | A | I | K | N | A | L | K | K | T | N | E | A | V | S | T | L | G | N | G | V | R | V | L | A | T |
| TN 96-12  |  | G                                                                                                 | V   | A   | I   | A | K | T | I | R | L | E | S | E | V | T | A | I | K | N | A | L | K | K | T | N | E | A | V | S | T | L | G | N | G | V | R | V | L | A | T |
|           |  | 170                                                                                               | 180 | 190 | 200 |   |   |   |   |   |   |   |   |   |   |   |   |   |   |   |   |   |   |   |   |   |   |   |   |   |   |   |   |   |   |   |   |   |   |   |   |
|           |  | . . . .   . . . .   . . . .   . . . .   . . . .   . . . .   . . . .   . . . .   . . . .   . . . . |     |     |     |   |   |   |   |   |   |   |   |   |   |   |   |   |   |   |   |   |   |   |   |   |   |   |   |   |   |   |   |   |   |   |   |   |   |   |   |
| CAN 97-83 |  | A                                                                                                 | V   | R   | E   | L | K | D | F | V | S | K | N | L | T | R | A | I | N | K | N | K | C | D | I | D | D | L | K | M | A | V | S | F | S | Q | F | N | R | R | F |
| S175H434  |  | A                                                                                                 | V   | R   | E   | L | K | D | F | V | S | K | N | L | T | S | A | I | N | K | N | K | C | D | I | D | D | L | K | M | A | V | S | F | S | Q | F | N | R | R | F |
| TN 94-49  |  | A                                                                                                 | V   | R   | E   | L | K | D | F | V | S | K | N | L | T | R | A | I | N | K | N | K | C | D | I | D | D | L | K | M | A | V | S | F | S | Q | F | N | R | R | F |
| TN 96-12  |  | A                                                                                                 | V   | R   | E   | L | K | D | F | V | S | K | N | L | T | R | A | I | N | K | N | K | C | D | I | A | D | L | K | M | A | V | S | F | S | Q | F | N | R | R | F |
|           |  | 210                                                                                               | 220 | 230 | 240 |   |   |   |   |   |   |   |   |   |   |   |   |   |   |   |   |   |   |   |   |   |   |   |   |   |   |   |   |   |   |   |   |   |   |   |   |
|           |  | . . . .   . . . .   . . . .   . . . .   . . . .   . . . .   . . . .   . . . .   . . . .   . . . . |     |     |     |   |   |   |   |   |   |   |   |   |   |   |   |   |   |   |   |   |   |   |   |   |   |   |   |   |   |   |   |   |   |   |   |   |   |   |   |
| CAN 97-83 |  | L                                                                                                 | N   | V   | V   | R | Q | F | S | D | N | A | G | I | T | P | A | I | S | L | D | L | M | T | D | A | E | L | A | R | A | V | S | N | M | P | T | S | A | G | Q |
| S175H434  |  | L                                                                                                 | N   | V   | V   | R | Q | F | S | D | N | A | G | I | T | P | A | I | S | L | D | L | M | T | D | A | E | L | A | R | A | V | S | N | M | P | T | S | A | G | Q |
| TN 94-49  |  | L                                                                                                 | N   | V   | V   | R | Q | F | S | D | N | A | G | I | T | P | A | I | S | L | D | L | M | T | D | A | E | L | A | R | A | V | S | N | M | P | T | S | A | G | Q |
| TN 96-12  |  | L                                                                                                 | N   | V   | V   | R | Q | F | S | D | N | A | G | I | T | P | A | I | S | L | D | L | M | T | D | A | E | L | A | R | A | V | S | N | M | P | T | S | A | G | Q |
|           |  | 250                                                                                               | 260 | 270 | 280 |   |   |   |   |   |   |   |   |   |   |   |   |   |   |   |   |   |   |   |   |   |   |   |   |   |   |   |   |   |   |   |   |   |   |   |   |
|           |  | . . . .   . . . .   . . . .   . . . .   . . . .   . . . .   . . . .   . . . .   . . . .   . . . . |     |     |     |   |   |   |   |   |   |   |   |   |   |   |   |   |   |   |   |   |   |   |   |   |   |   |   |   |   |   |   |   |   |   |   |   |   |   |   |
| CAN 97-83 |  | I                                                                                                 | K   | L   | M   | L | E | N | R | A | M | V | R | R | K | G | F | G | I | L | I | G | V | Y | G | S | S | V | I | Y | M | V | Q | L | P | I | F | G | V | I | D |
| S175H434  |  | I                                                                                                 | K   | L   | M   | L | E | N | R | A | M | V | R | R | K | G | F | G | I | L | I | G | V | Y | G | S | S | V | I | Y | M | V | Q | L | P | I | F | G | V | I | D |
| TN 94-49  |  | I                                                                                                 | K   | L   | M   | L | E | N | R | A | M | V | R | R | K | G | F | G | I | L | I | G | V | Y | G | S | S | V | I | Y | M | V | Q | L | P | I | F | G | V | I | D |
| TN 96-12  |  | I                                                                                                 | K   | L   | M   | L | E | N | R | A | M | V | R | R | K | G | F | G | I | L | I | G | V | Y | G | S | S | V | I | Y | M | V | Q | L | P | I | F | G | V | I | D |
|           |  | 290                                                                                               | 300 | 310 | 320 |   |   |   |   |   |   |   |   |   |   |   |   |   |   |   |   |   |   |   |   |   |   |   |   |   |   |   |   |   |   |   |   |   |   |   |   |
|           |  | . . . .   . . . .   . . . .   . . . .   . . . .   . . . .   . . . .   . . . .   . . . .   . . . . |     |     |     |   |   |   |   |   |   |   |   |   |   |   |   |   |   |   |   |   |   |   |   |   |   |   |   |   |   |   |   |   |   |   |   |   |   |   |   |
| CAN 97-83 |  | T                                                                                                 | P   | C   | W   | I | V | K | A | A | P | S | C | S | G | K | K | G | N | Y | A | C | L | L | R | E | D | Q | G | W | Y | C | Q | N | A | G | S | T | V | Y | Y |
| S175H434  |  | T                                                                                                 | P   | C   | W   | I | V | K | A | A | P | S | C | S | G | K | K | G | N | Y | A | C | L | L | R | E | D | Q | G | W | Y | C | Q | N | A | G | S | T | V | Y | Y |
| TN 94-49  |  | T                                                                                                 | P   | C   | W   | I | V | K | A | A | P | S | C | S | K | K | K | G | N | Y | A | C | L | L | R | E | D | Q | G | W | Y | C | Q | N | A | G | S | T | V | Y | Y |
| TN 96-12  |  | T                                                                                                 | P   | C   | W   | I | V | K | A | A | P | S | C | S | E | K | K | G | N | Y | A | C | L | L | R | E | D | Q | G | W | Y | C | Q | N | A | G | S | T | V | Y | Y |
|           |  | 330                                                                                               | 340 | 350 | 360 |   |   |   |   |   |   |   |   |   |   |   |   |   |   |   |   |   |   |   |   |   |   |   |   |   |   |   |   |   |   |   |   |   |   |   |   |
|           |  | . . . .   . . . .   . . . .   . . . .   . . . .   . . . .   . . . .   . . . .   . . . .   . . . . |     |     |     |   |   |   |   |   |   |   |   |   |   |   |   |   |   |   |   |   |   |   |   |   |   |   |   |   |   |   |   |   |   |   |   |   |   |   |   |
| CAN 97-83 |  | P                                                                                                 | N   | E   | K   | D | C | E | T | R | G | D | H | V | F | C | D | T | A | A | G | I | N | V | A | E | Q | S | K | E | C | N | I | N | I | S | T | T | N | Y | P |

S175H434  
TTN 94-49  
TTN 96-12

PNEKDCETRGDHFVFCDTAAGINVAEQSKECNINISTTNYP  
PNEKDCETRGDHFVFCDTAAGINVAEQSKECNINISTTNYP  
PNEKDCETRGDHFVFCDTAAGINVAEQSKECNINISTTNYP

370 380 390 400

CAN 97-83  
S175H434  
TTN 94-49  
TTN 96-12

. . . . | . . . . | . . . . | . . . . | . . . . | . . . . | . . . . | . . . . |  
CKVSTGRHPISMVALSPLGALVACYKGVSCSIGSNRVGII  
CKVSTGRHPISMVALSPLGALVACYKGVSCSIGSNRVGII  
CKVSTGRHPISMVALSPLGALVACYKGVSCSIGSNRVGII  
CKVSTGRHPISMVALSPLGALVACYKGVSCSIGSNRVGII

410 420 430 440

CAN 97-83  
S175H434  
TTN 94-49  
TTN 96-12

. . . . | . . . . | . . . . | . . . . | . . . . | . . . . | . . . . | . . . . |  
KQLNKGCYSITNQDADTVTIDNTVYQLSKVEGEQHVIKGR  
KQLNKGCYSITNQDADTVTIDNTVYQLSKVEGEHHVIKGR  
KQLNKGCYSITNQDADTVTIDNTVYQLSKVEGEQHVIKGR  
KQLNKGCYSITNQDADTVTIDNTVYQLSKVEGEQHVIKGR

450 460 470 480

CAN 97-83  
S175H434  
TTN 94-49  
TTN 96-12

. . . . | . . . . | . . . . | . . . . | . . . . | . . . . | . . . . | . . . . |  
PVSSSFDPVKFPEDQFNVALDQVFENIENSQALVDQSNRI  
PVSSSFDPVKFPEDQFNVALDQVFENIENSQALVDQSNRI  
PVSSSFDPVKFPEDQFNVALDQVFENIENSQALVDQSNRI  
PVSSSFDPVKFPEDQFNVALDQVFESIENSQALVDQSNRI

490 500 510 520

CAN 97-83  
S175H434  
TTN 94-49  
TTN 96-12

. . . . | . . . . | . . . . | . . . . | . . . . | . . . . | . . . . | . . . . |  
LSSAEKGNTGFIIVILIAVLGSSMILVSIFFIIKKTKKP  
LSSAEKGNTGFIIVILIAVLGSSMILVSIFFIIKKTKKP  
LSSAEKGNTGFIIVILIAVLGSSMILVSIFFIIKKTKKQ  
LSSAEKGNTGFIIVILIAVLGSTMILVSVFFIIKKTKKP

530

CAN 97-83  
S175H434  
TTN 94-49  
TTN 96-12

. . . . | . . . . | . . . . | . . . . |  
TGAPPEELSGVTNNGFIPHS  
TGAPPEELSGVTNNGFIPHS  
TGAPPEELSGVTNNGFIPHS  
TGAPPEELSGVTNNGFIPHS
